# Supplementary material for: Early auroral photography and observations at the Sodankylä Geophysical Observatory in Finland, 1927–1929
Source: Copernicus journal article supplement (doi:10.5194/hgss-2024-1), 2024-02-01

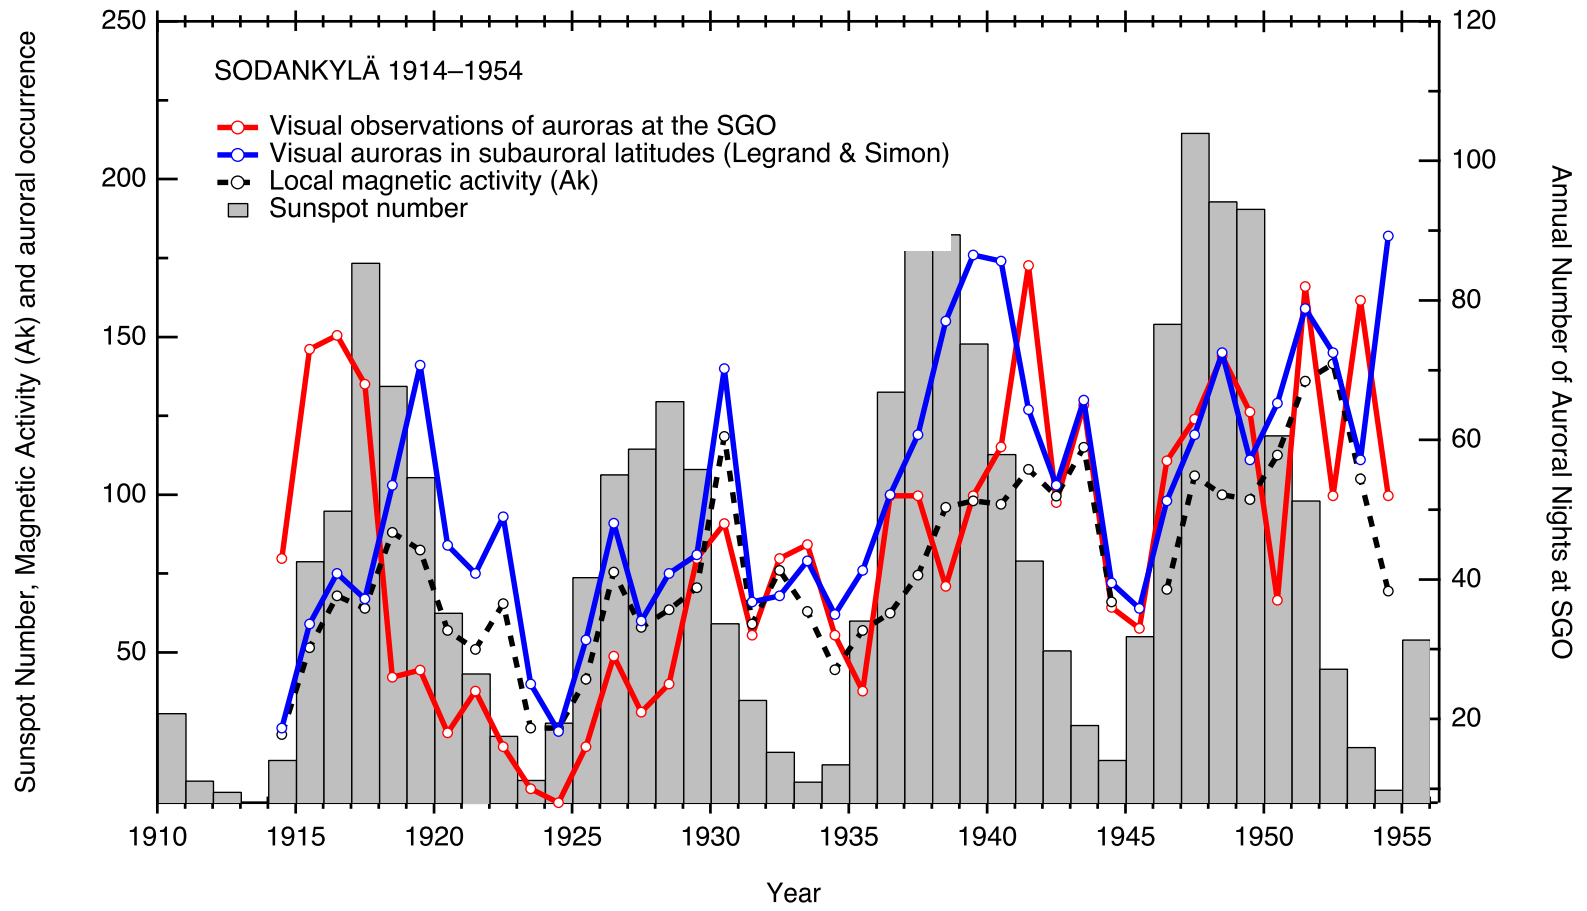

Supplement: Supplementary file [file hgss-2024-1-AC5-supplement.pdf]
